# Supplementary material for: Phycocyanin-based nanocarrier as a new nanoplatform for efficient overcoming of cancer drug resistance
Source: Royal Society of Chemistry journal article supplement (doi:10.1039/c7tb00287d), 2017-01-01
Supplement: c7tb00287d1.pdf [file c7tb00287d1.pdf]

## SUPPLEMENTARY INFORMATION

For

### Phycocyanin-based nanocarrier as a new nanoplatform for efficient overcoming of cancer drug resistance

#### Results

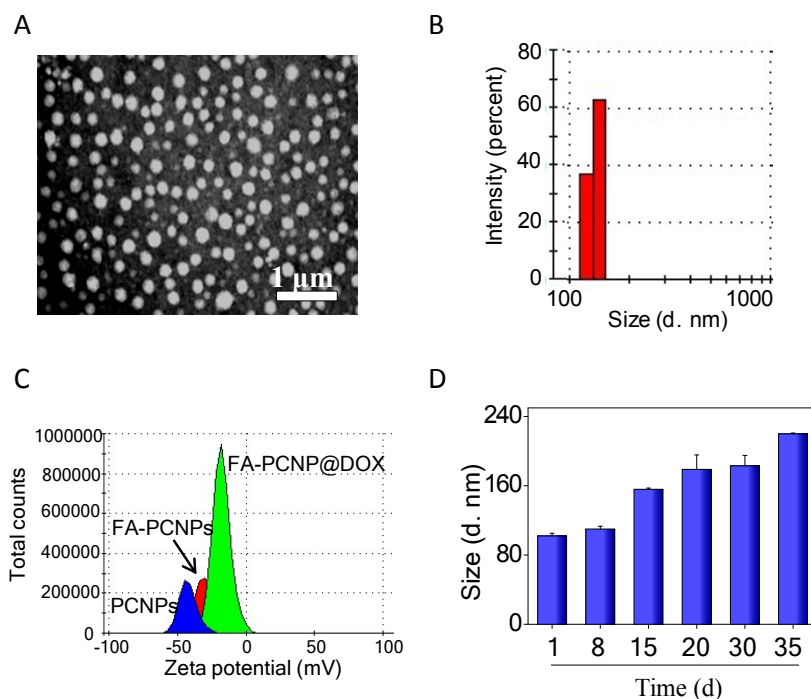

**Figure S1.** (A) TEM image of PCNPs. (B) Size distribution of PCNPs. (C) Zeta potential of PCNPs, FA-PCNPs and FA-PCNP@DOX. (D) Size variation of PCNPs in aqueous solution monitored for 35 days. Values expressed were means  $\pm$  SD of 3 independent experiments.

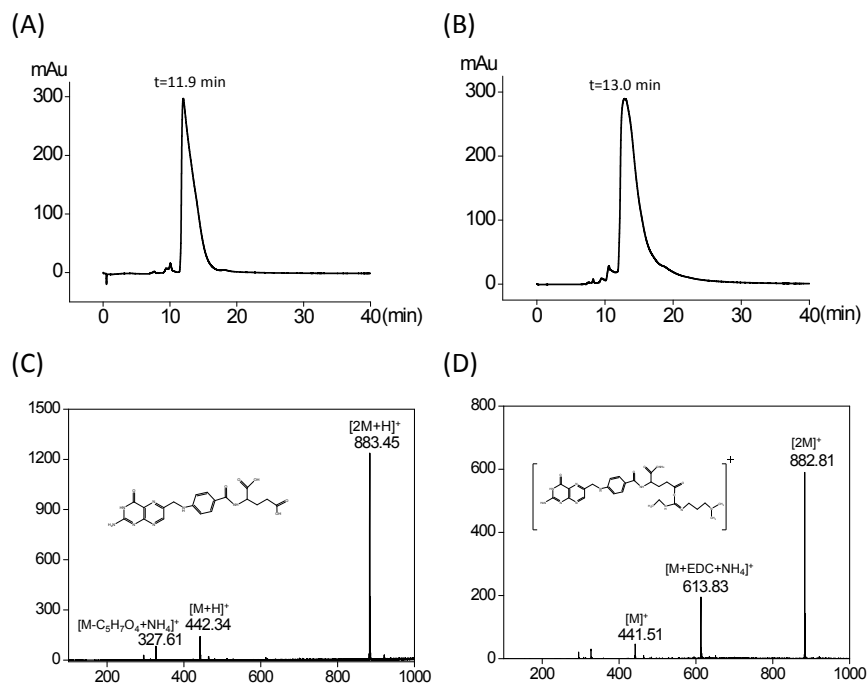

**Figure S2.** HPLC spectra of compound (A) FA and (B) FA-EDC. The ESI-MS spectra of compound (C) FA and (D) FA-EDC.

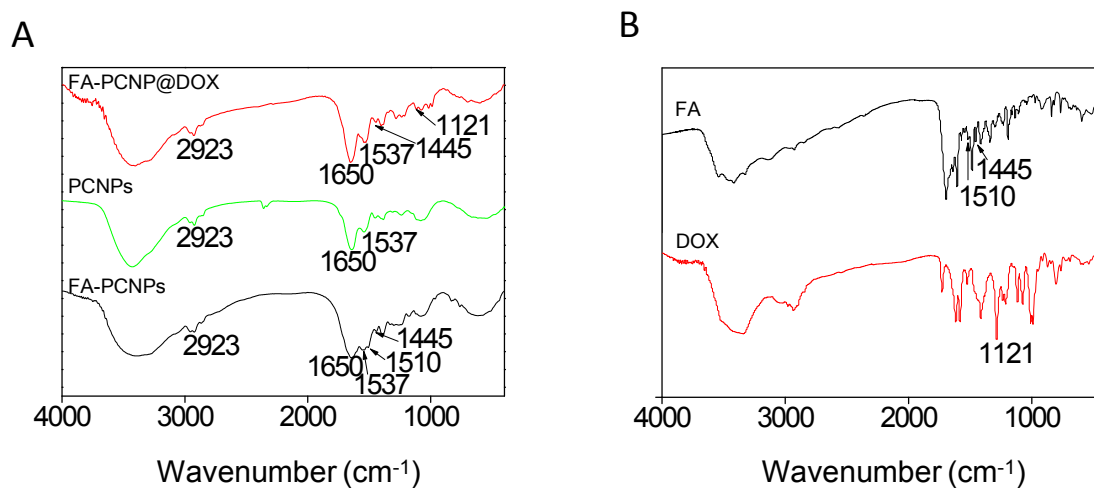

**Figure S3.** (A) FT-IR spectra of PCNPs, FA-PCNPs and FA-PCNP@DOX. (B) FT-IR spectra of FA and DOX.

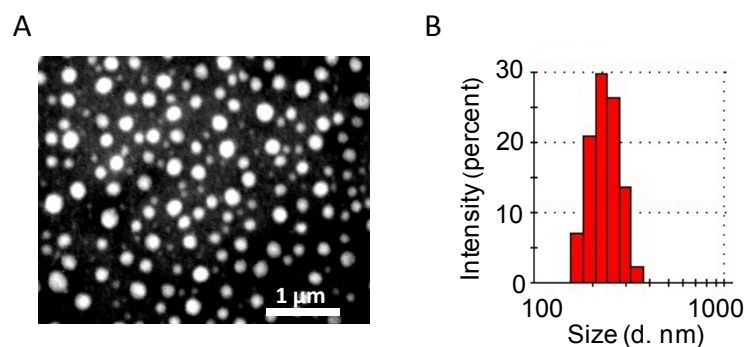

**Figure S4.** (A) TEM image of FA-PCNP@DOX. (B) Size distribution of FA-PCNP@DOX.

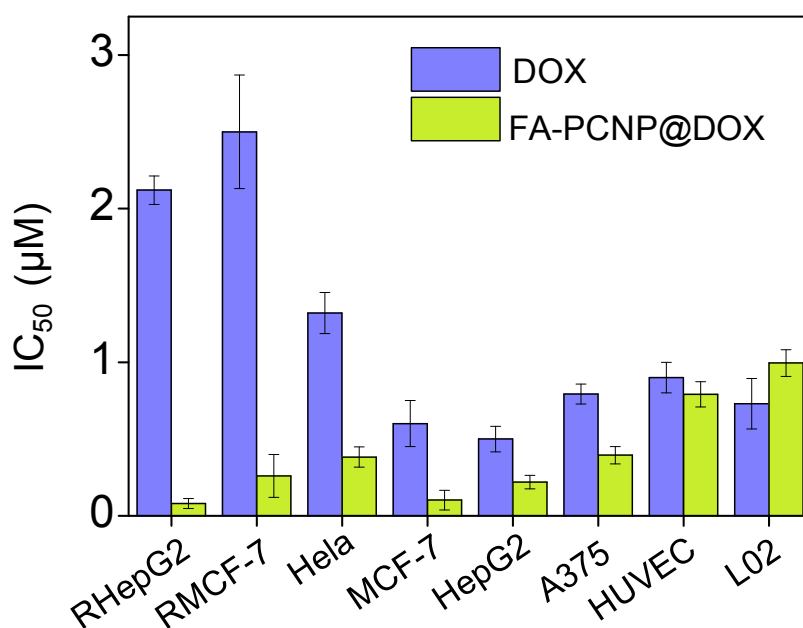

**Figure S5.** The cytotoxicities of FA-PCNP@DOX or DOX towards RHepG2, RMCF-7, Hela, MCF-7, HepG2, A375, HUVEC and L02 cells for 36 h. Values expressed were means  $\pm$  SD of 3 independent experiments.

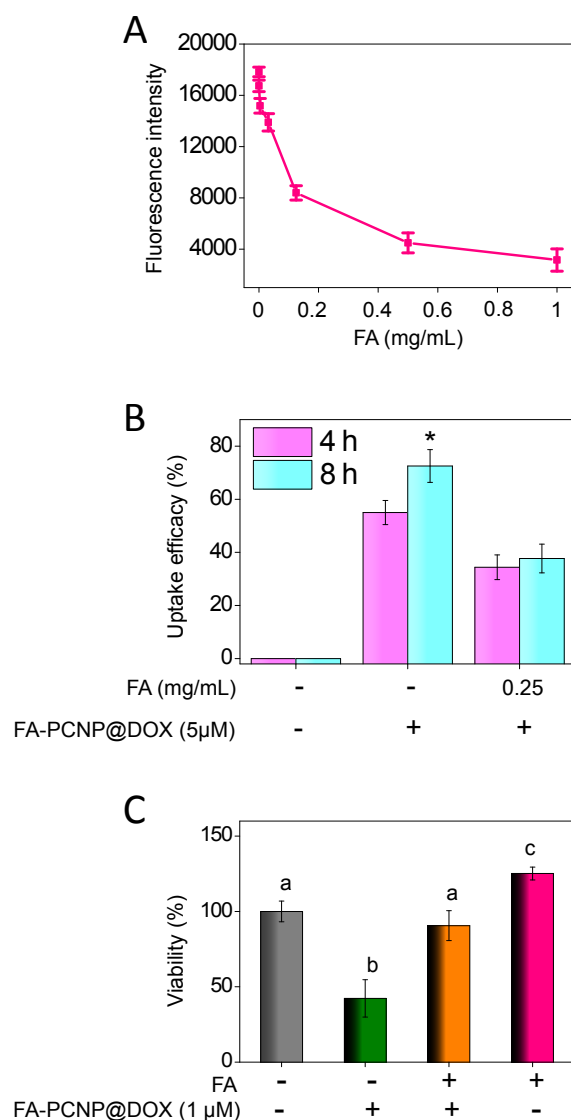

**Figure S6.** (A) The fluorescence intensity of FA-PCNP@DOX in RHepG2 cells after blocked with excess amount of FA. The cells pretreated with different concentrations of FA for 1 h were subjected to 5 μM FA-PCNP@DOX treatment for 3 h. The fluorescence of FA-PCNP@DOX in the cells was determined with the excitation and emission wavelength at 485 nm and 590 nm respectively. (B) The uptake efficiency of FA-PCNP@DOX in RHepG2 after treated with excess FA 0.25 mg/mL. 5 μM FA-PCNP@DOX was initially fed to the RHepG2 cells. At the time point of 4 h and 8 h, the uptake efficiency of FA-PCNP@DOX was measured. \* indicated the statistical difference of uptake efficacy in the time point of 4 h and 8 h at  $P < 0.05$  level. (C) The cytotoxicity of FA-PCNP@DOX in RHepG2 cells after treated with excess FA (0.25 mg/mL). The cell viability was measured after 24 h of FA-PCNP@DOX treatment. Different letters represented significantly different means in three or more groups ( $P < 0.05$ , Tukey's test, one-way ANOVA). Values expressed were means  $\pm$  SD of 3 independent experiments.

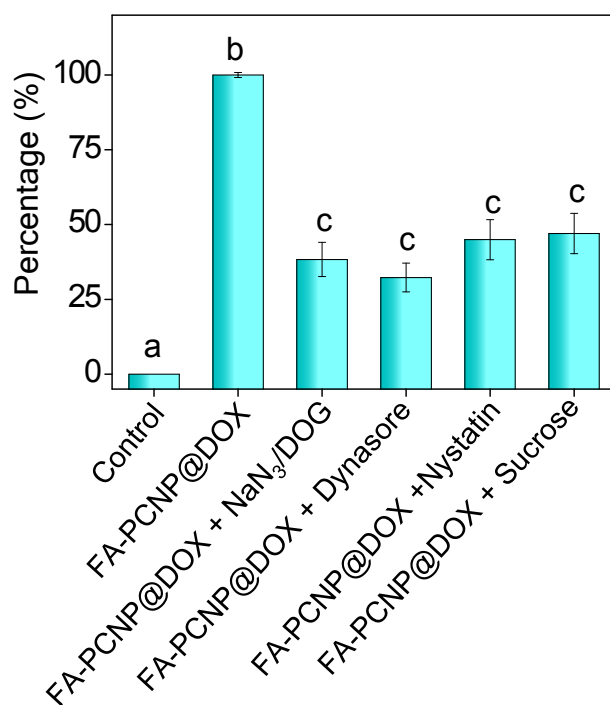

**Figure S7.** Intracellular uptake of FA-PCNP@DOX in RHepG2 cells with the pretreatment of different endocytosis inhibitors. Different letters represented significantly different means in three or more groups ( $P < 0.05$ , Tukey's test, one-way ANOVA). Values expressed were means  $\pm$  SD of 3 independent experiments.

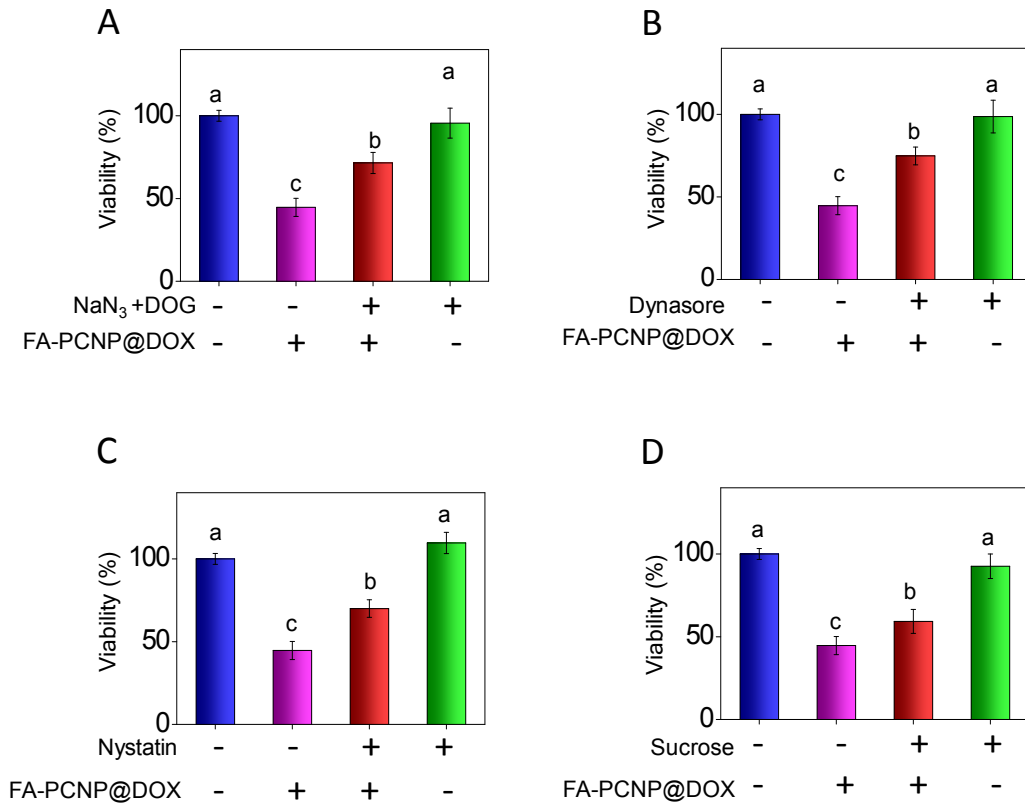

**Figure S8.** The pretreatment of NaN<sub>3</sub>/DOG, dynasore, nystatin and sucrose decreased the cytotoxicity of FA-PCNP@DOX (1 μM) in RHePG2 cells at 24 h of treatment. Values expressed were means ± SD of 3 independent experiments. Different letters represented significantly different means in three or more groups ( $P < 0.05$ , Tukey's test, one-way ANOVA).

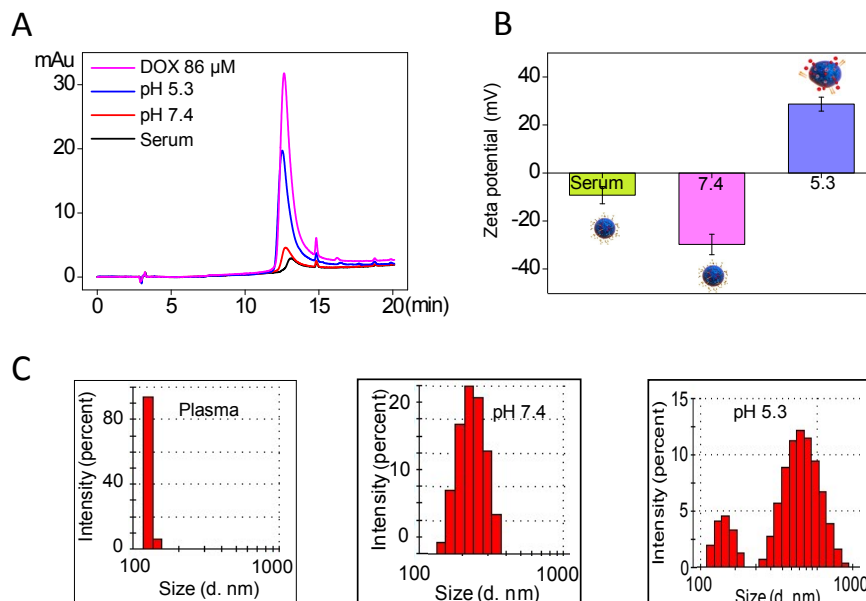

**Figure S9.** (A) The HPLC spectra of DOX released from FA-PCNP@DOX at pH 7.4, pH 5.3 or in serum. The spectrum of DOX with the concentration of 86  $\mu\text{M}$  recorded the standard curve of DOX. The zeta potential (B) and size distribution (C) of FA-PCNP@DOX in PBS solutions at pH 7.4, pH 5.3 and in serum. Values expressed were means  $\pm$  SD of 3 independent experiments.

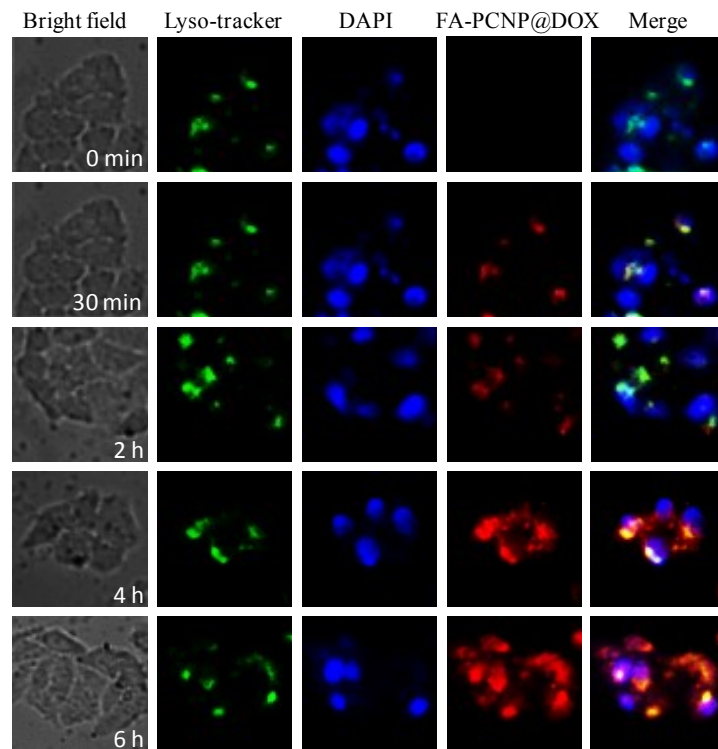

**Figure S10.** Intracellular trafficking of FA-PCNP@DOX in RHePG2 cells for 6 h, as detected by LysoTracker-DAPI staining.



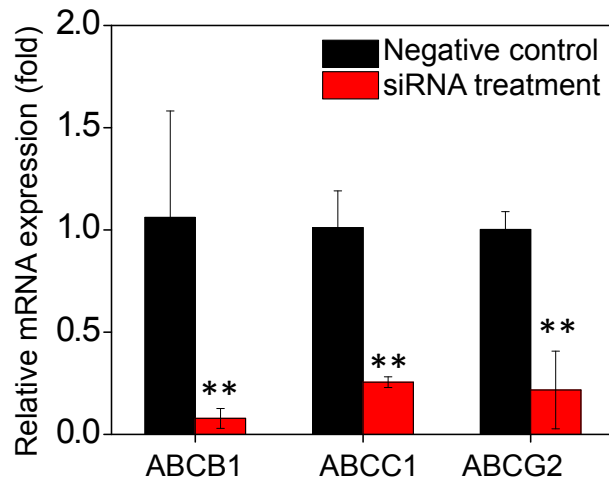

**Figure S11.** mRNA expression level of ABCB1, ABCC1 and ABCG2 in RHePG2 cells after treatment of siABCB1, siABCC1 and siABCG2. The RHePG2 cells were treated with 400 ng/mL of control siRNA, siABCB1, siABCC1 or siABCG2 respectively for 24 h in FBS-free DMEM. \*\* represented the statistical difference of mRNA expression between negative control and siRNA treatment group at  $P < 0.01$  level.

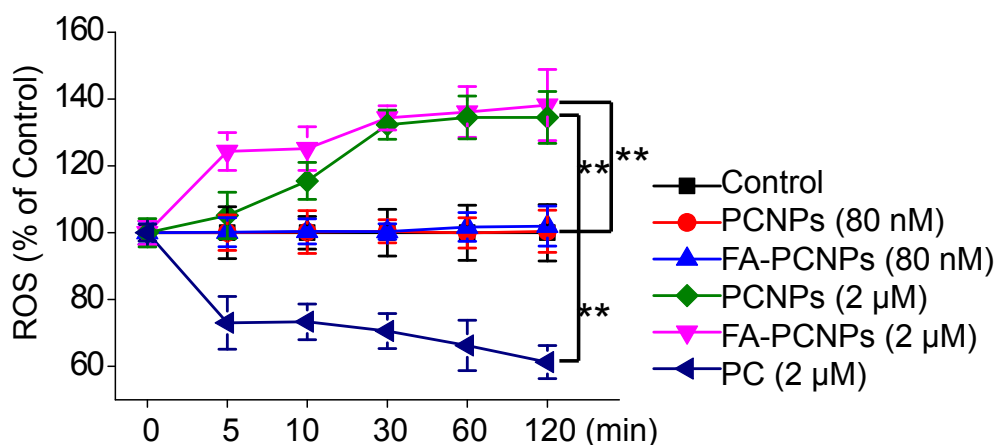

**Figure S12.** Intracellular ROS generation in RHepG2 cells after treatment of PC solution, PCNPs and FA-PCNPs with different concentrations. \*\* indicated the statistical difference between treatment group and control group at  $P < 0.01$  level. Values expressed were means  $\pm$  SD of 3 independent experiments.

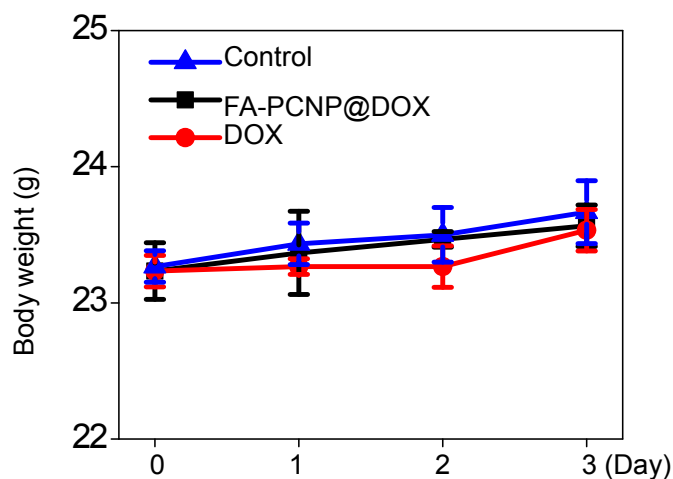

**Figure S13.** Body weight of nude mice after treated with 2.5 mg/kg FA-PCNP@DOX or DOX for 3 days of treatment,  $n=3$ .

**Table S1.** The ESI-MS analysis of compound (1) FA and (2) FA-EDC.

| Complexes | Theoretical value<br>(m/z) | Measured value<br>(m/z) | Belonging to<br>(m/z)                                                           |
|-----------|----------------------------|-------------------------|---------------------------------------------------------------------------------|
| (1)       | 883.4                      | 883.45                  | [2M+H] <sup>+</sup>                                                             |
|           | 442.14                     | 442.34                  | [M+H] <sup>+</sup>                                                              |
|           | 328.11                     | 327.61                  | [M-C <sub>5</sub> H <sub>7</sub> O <sub>4</sub> +NH <sub>4</sub> ] <sup>+</sup> |
| (2)       | 882.28                     | 882.81                  | [2M] <sup>+</sup>                                                               |
|           | 613.31                     | 613.83                  | [M+EDC+NH <sub>4</sub> ] <sup>+</sup>                                           |
|           | 441.14                     | 441.51                  | [M] <sup>+</sup>                                                                |

**Table S2.** *In vitro* release kinetic models of DOX from FA-PCNP@DOX.

|        | Model         | Equation                          | R <sup>2</sup> |
|--------|---------------|-----------------------------------|----------------|
| Serum  | Zero-order    | Q = 1.142 + 0.0408t               | 0.7523         |
|        | First-order   | ln(3.025-Q) = 1.107-0.1310t       | 0.7877         |
|        | Higuchi       | Q = 0.5170+0.3896t <sup>1/2</sup> | 0.8925         |
|        | Ritger-peppas | lnQ=0.3122lnt-0.05881             | <b>0.9311</b>  |
| pH 7.4 | Zero-order    | Q = 1.846 + 0.0729t               | 0.7094         |
|        | First-order   | ln(5.518-Q) = 1.708-0.1018t       | 0.9281         |
|        | Higuchi       | Q = 0.6474+0.7164t <sup>1/2</sup> | 0.9014         |
|        | Ritger-peppas | lnQ=0.3612 +0.3483 lnt            | <b>0.9383</b>  |
| pH 5.3 | Zero-order    | Q = 32.46+ 0.8562t                | 0.6237         |
|        | First-order   | ln(71.67-Q) = 4.272-0.1823t       | 0.9172         |
|        | Higuchi       | Q =17.26+8.696t <sup>1/2</sup>    | 0.8607         |
|        | Ritger-peppas | lnQ=3.358+0.2495lnt               | <b>0.9787</b>  |

**Table S3.** Pharmaceutical parameters of FA-PCNP@DOX and DOX after iv injection at an equivalent dose of 4.21 mg DOX per kg of mouse body weight.

| Parameter                                              | FA-PCNP@DOX | DOX    |
|--------------------------------------------------------|-------------|--------|
| $t_{1/2\beta}$ (h)                                     | 30.1        | 19.0   |
| $AUC_{0-48\text{ h}}$ ( $\mu\text{g/L}\cdot\text{h}$ ) | 56847.8     | 4688.5 |
| $C_{\text{max}}$ ( $\mu\text{g/L}$ )                   | 1356.7      | 688.9  |
| Cl (mL/h)                                              | 5.1         | 60.7   |

$t_{1/2\beta}$ , elimination phase, half-life period of medicine.

$AUC_{0-48\text{ h}}$ , area under curve.

$C_{\text{max}}$ , maximum concentration observed.

Cl, clearance of medicine.
